# Supplementary material for: Drosophila Kruppel homolog 1 represses lipolysis through interaction with dFOXO
Source: PubMed Central journal article supplement (PMC5703730; doi:10.1038/s41598-017-16638-1), 2017-11-27
Supplement: 41598_2017_16638_MOESM1_ESM.pdf [file 41598_2017_16638_MOESM1_ESM.pdf]

## Supplementary Information

### **Drosophila Kruppel homolog 1 represses lipolysis through interaction with dFOXO**

Ping Kang <sup>1</sup>, Kai Chang <sup>1</sup>, Ying Liu <sup>1</sup>, Mark Bouska <sup>1</sup>, Allison Birnbaum <sup>1</sup>, Galina Karashchuk <sup>2</sup>, Rachel Thakore <sup>2</sup>, Wenjing Zheng <sup>2</sup>, Stephanie Post <sup>2</sup>, Colin S. Brent <sup>3</sup>, Sheng Li <sup>4</sup>, Marc Tatar <sup>2\*</sup>, Hua Bai <sup>1,2\*</sup>

Supplementary Table S1. Putative KLF binding sites in the promoters of InR and bmm.

Supplementary Table S2. List of Primers

Supplementary figure S1. Original full-length blots for Figure 1C & 1D

Supplementary figure S2. Original full-length blots for Figure 2A

Supplementary figure S3. Original full-length blots for Figure 3A

Supplementary figure S4. Original full-length blots for Figure 3B

Supplementary figure S5. Original full-length blots for Figure 3C

Supplementary figure S6. Immunostaining to show the cytoplasmic expression of Kr-h1 in Kc167 cells

**Supplementary Table S1. Putative KLF binding sites in the promoters of InR and bmm.**

| <b>Brummer promoter</b> |                   |              |                       |                                |              |            |
|-------------------------|-------------------|--------------|-----------------------|--------------------------------|--------------|------------|
| <b>Model ID</b>         | <b>Model name</b> | <b>Score</b> | <b>Relative score</b> | <b>Predicted site sequence</b> | <b>Start</b> | <b>End</b> |
| MA0599.1                | KLF5              | 10.999       | 0.943175564           | cccactccca                     | 14778617     | 14778626   |
| MA0599.1                | KLF5              | 8.222        | 0.907848237           | ctcactccca                     | 14778639     | 14778648   |
| MA0493.1                | Klf1              | 12.451       | 0.922097346           | agaccaccca                     | 14778983     | 14778993   |
| MA0039.2                | Klf4              | 11.870       | 0.938178771           | tgggtgggtc                     | 14778984     | 14778993   |
| MA0039.2                | Klf4              | 11.760       | 0.936309891           | ggggagtggc                     | 14774266     | 14774275   |
| MA0599.1                | KLF5              | 13.400       | 0.973719645           | gccactcccc                     | 14774266     | 14774275   |
| MA0741.1                | KLF16             | 13.178       | 0.933335628           | cacacacccc                     | 14774348     | 14774358   |
|                         |                   |              |                       |                                |              |            |
| <b>InR promoter</b>     |                   |              |                       |                                |              |            |
| <b>Model ID</b>         | <b>Model name</b> | <b>Score</b> | <b>Relative score</b> | <b>Predicted site sequence</b> | <b>Start</b> | <b>End</b> |
| MA0599.1                | KLF5              | 10.517       | 0.93704385            | gtactcccc                      | 17428300     | 17428309   |
| MA0493.1                | Klf1              | 11.370       | 0.903823178           | agcccctccca                    | 17429438     | 17429448   |
| MA0039.2                | Klf4              | 12.632       | 0.951125009           | tgggaggggc                     | 17429439     | 17429448   |
| MA0741.1                | KLF16             | 15.852       | 0.977047928           | gccacgcccac                    | 17441804     | 17441814   |
| MA0493.1                | Klf1              | 14.076       | 0.949567765           | tgccacgcca                     | 17441805     | 17441815   |
| MA0039.2                | Klf4              | 15.263       | 0.99582521            | tgggcgtggc                     | 17441805     | 17441814   |
| MA0599.1                | KLF5              | 13.501       | 0.975004507           | gccacgcca                      | 17441805     | 17441814   |
| MA0599.1                | KLF5              | 10.638       | 0.938583139           | ttcccgcca                      | 17442990     | 17442999   |
| MA0493.1                | Klf1              | 11.163       | 0.900323869           | agatacaccca                    | 17443145     | 17443155   |
| MA0599.1                | KLF5              | 8.711        | 0.914069002           | tccccgccta                     | 17445459     | 17445468   |

**Supplementary Table S2. List of Primers**

| <b>Name</b>       | <b>Directions</b> | <b>Sequence 5'-&gt;3'</b>   | <b>Assays</b> |
|-------------------|-------------------|-----------------------------|---------------|
| <i>Kr-h1</i>      | Forward           | TCA CAC ATC AAG AAG CCA ACT | qRT-PCR       |
|                   | Reverse           | GCTGGT TGG CGG AAT AGT AA   |               |
| <i>bmm</i>        | Forward           | GGCTACAATCATGTGCTGAAAC      | qRT-PCR       |
|                   | Reverse           | CCTCCATCTCCTTCTTGTCTT       |               |
| <i>Lsd-1</i>      | Forward           | CAAGGAGTACATGTCCGATCAC      | qRT-PCR       |
|                   | Reverse           | CGGCTGCATAAGTGGTAAGT        |               |
| <i>FASN1</i>      | Forward           | TTCCACCGTGCCACTATTC         | qRT-PCR       |
|                   | Reverse           | AGTACCGCTCTCACAAATC         |               |
| <i>dilp2</i>      | Forward           | TCATCTCGATGGTGGCCGTGATTT    | qRT-PCR       |
|                   | Reverse           | ACACCATACTCAGCACCTCGTTGA    |               |
| <i>dilp5</i>      | Forward           | GGTTGCCTGTCCCAATGGATTCAA    | qRT-PCR       |
|                   | Reverse           | TATCCAAATCCGCCAAGTGGTCCT    |               |
| <i>InR</i>        | Forward           | TAT CCA AGA GTC CCG CAA AG  | qRT-PCR       |
|                   | Reverse           | GGT CGT CGC TGT TAGTGG AG   |               |
| <i>4ebp</i>       | Forward           | CCATGATCACCAGGAAGGTTGTCA    | qRT-PCR       |
|                   | Reverse           | AGCCCGCTCGTAGATAAGTTTGGT    |               |
| <i>Act5C</i>      | Forward           | TCGCGATTTGACCGACTACCTGAT    | ChIP-PCR      |
|                   | Reverse           | TGATGTCACGGACGATTCACGCT     |               |
| <i>InR-P1</i>     | Forward           | TGTGTGTGTGTATGTGTGTGTA      | ChIP-PCR      |
|                   | Reverse           | TACAAGTGCGGGCGATTC          |               |
| <i>InR-P2</i>     | Forward           | TCTCCATTCCTGGTCCCATTA       | ChIP-PCR      |
|                   | Reverse           | CTGCTTGGCCTTGAACCTAGA       |               |
| <i>InR-P3</i>     | Forward           | CAACTCGAACTTGCAACAAAGTA     | ChIP-PCR      |
|                   | Reverse           | GTGGATTAAAGTGGCACGAATG      |               |
| <i>bmm-P1</i>     | Forward           | CACCGCGCCGCAATGAATGTATAA    | ChIP-PCR      |
|                   | Reverse           | TTCAATCACTGTTTGTCTGGTCCGGC  |               |
| <i>bmm-P2</i>     | Forward           | AAGGAGCTGCAACGACTAAA        | ChIP-PCR      |
|                   | Reverse           | CTTTGGACTCGGCGTTAGAT        |               |
| <i>bmm-P3</i>     | Forward           | AAATTGCAGCTGCCACAGTTCGTG    | ChIP-PCR      |
|                   | Reverse           | TGCCATGAATTCTCCTCACTTGGC    |               |
| <i>bmm-3'-UTR</i> | Forward           | AAACATCAGCGCCACAATTCTCCC    | ChIP-PCR      |
|                   | Reverse           | ATATACATGTCGCTGCTGTGCGTG    |               |

Supplementary figure S1. Original full-length blots for Figure 1C & 1D

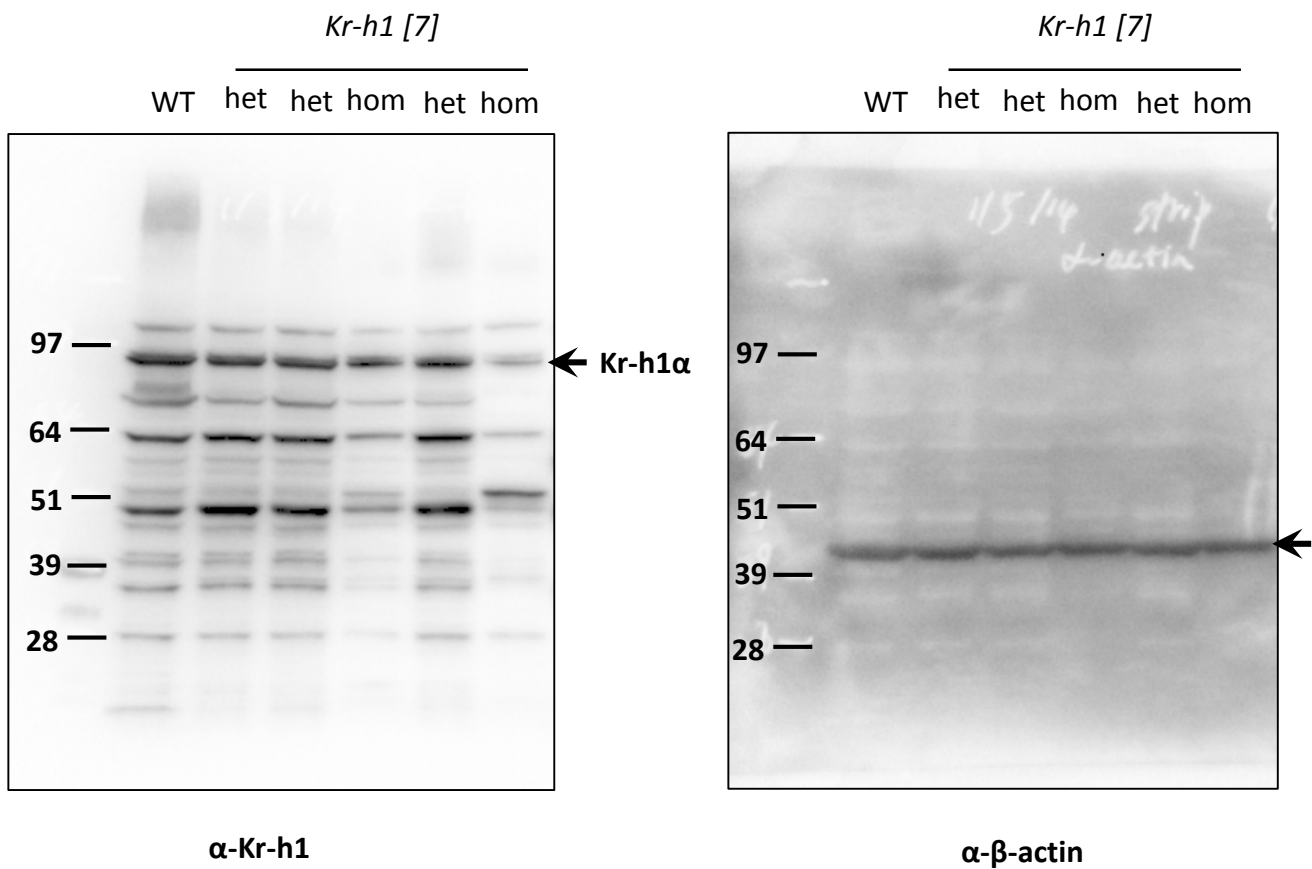

Kr-h1 $\alpha$ -Halo    E1: First elution  
fusion protein    E2: Second elution

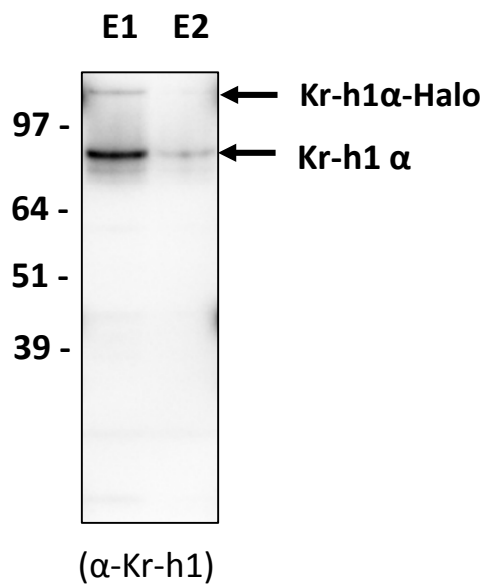

Supplementary figure S2. Original full-length blots for Figure 2A

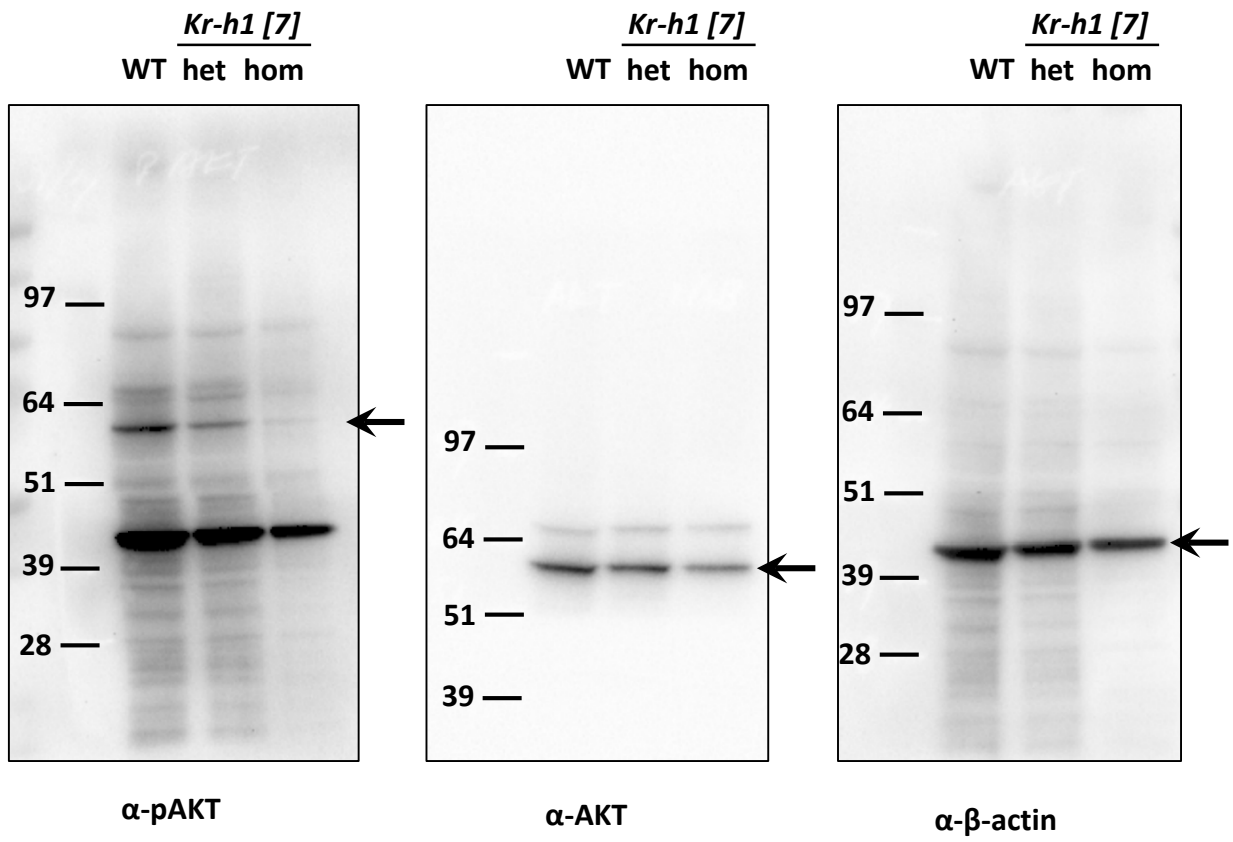

Supplementary figure S3. Original full-length blots for Figure 3A

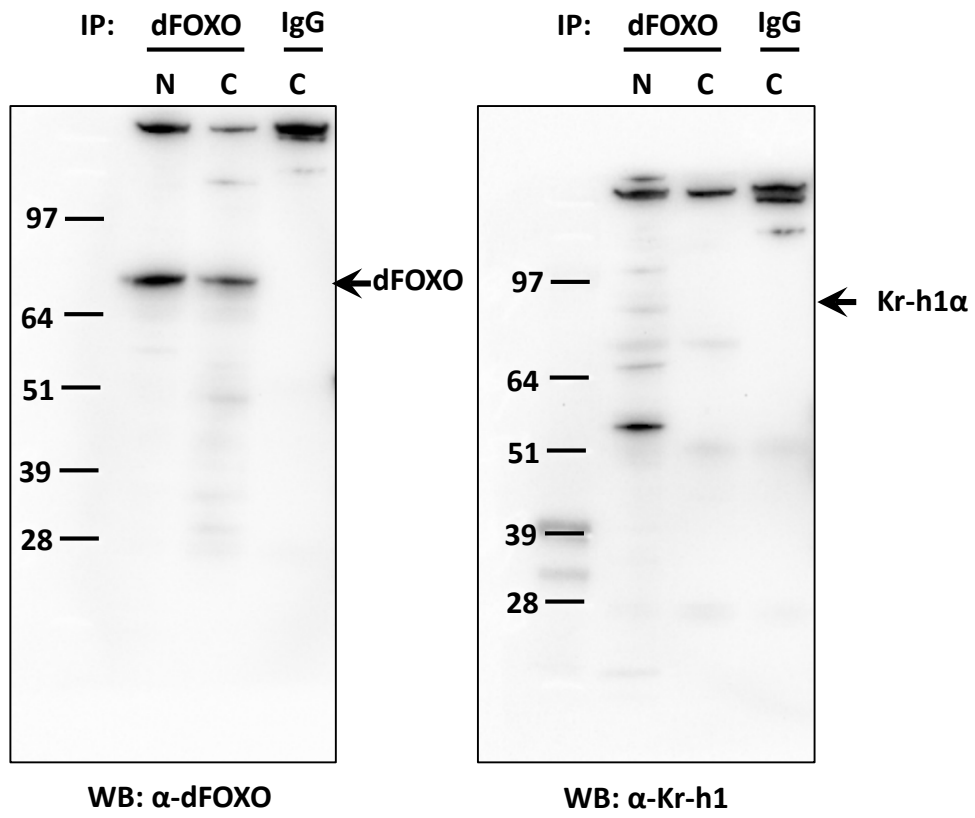

Supplementary figure S4. Original full-length blots for Figure 3B

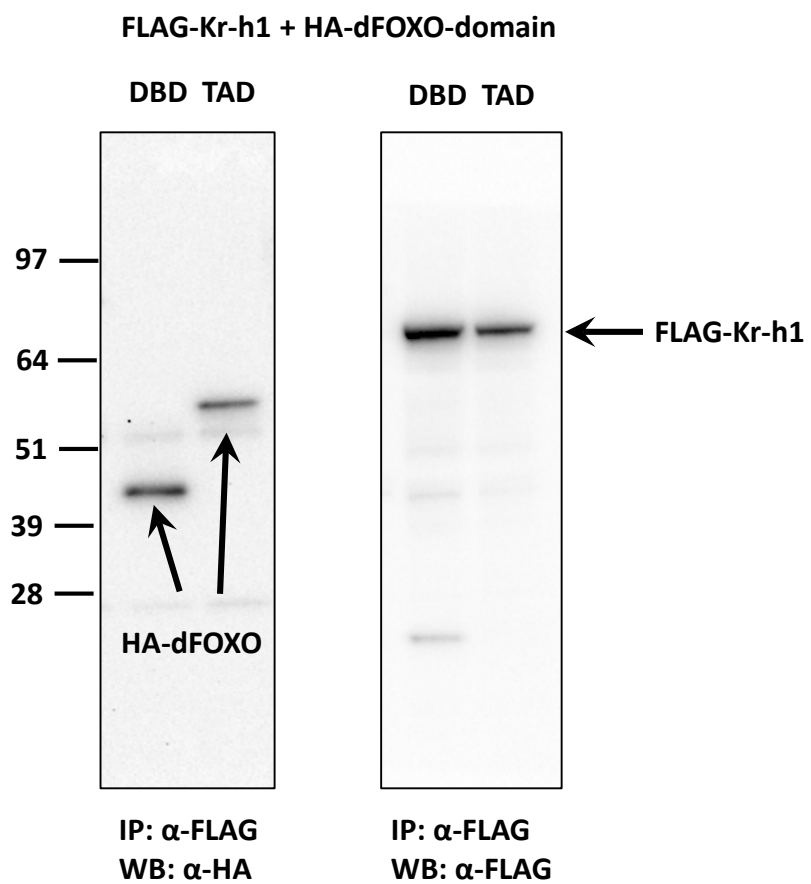

Supplementary figure S5. Original full-length blots for Figure 3C

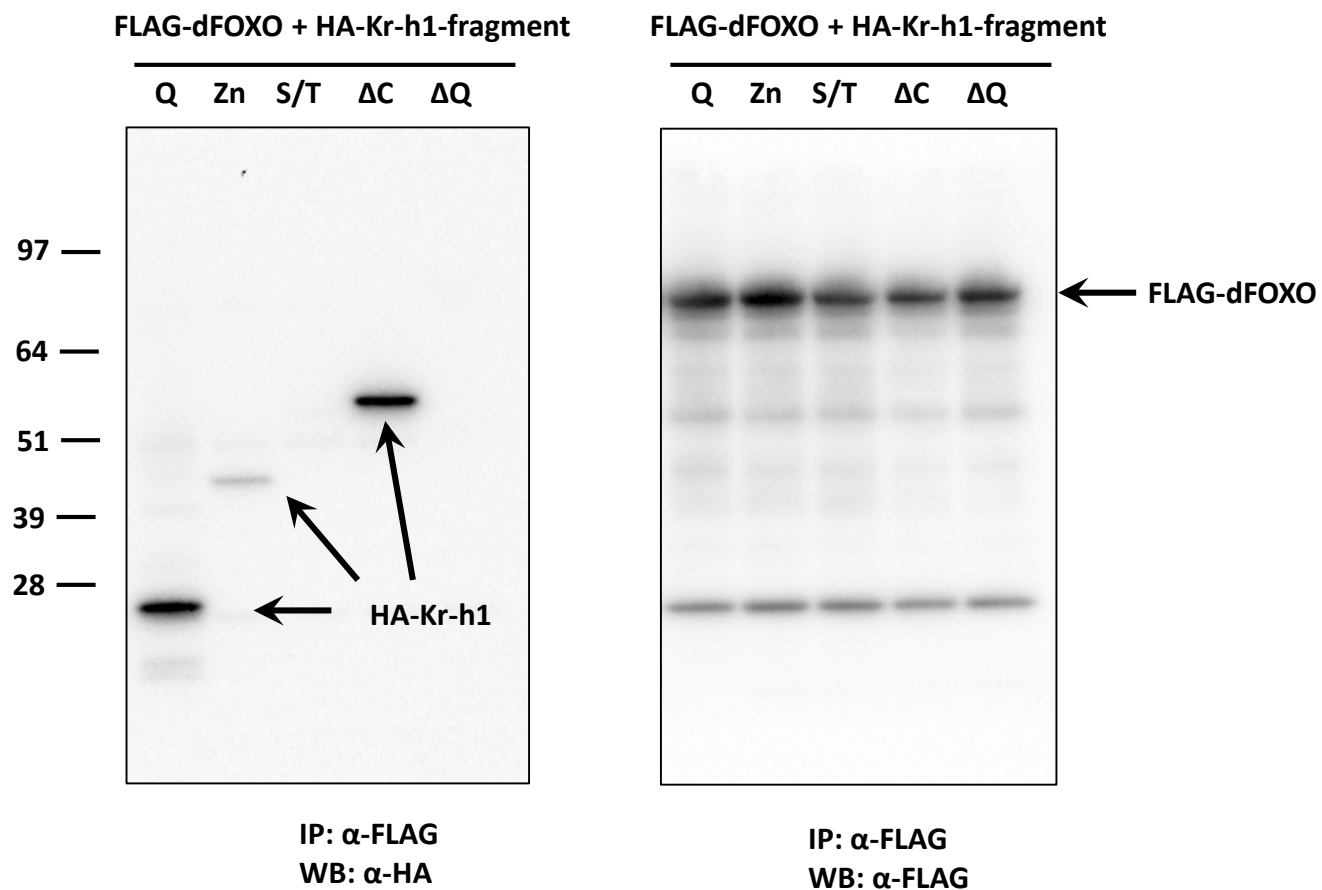



Supplementary figure S6. Immunostaining to show the cytoplasmic expression of Kr-h1 in Kc167 cells

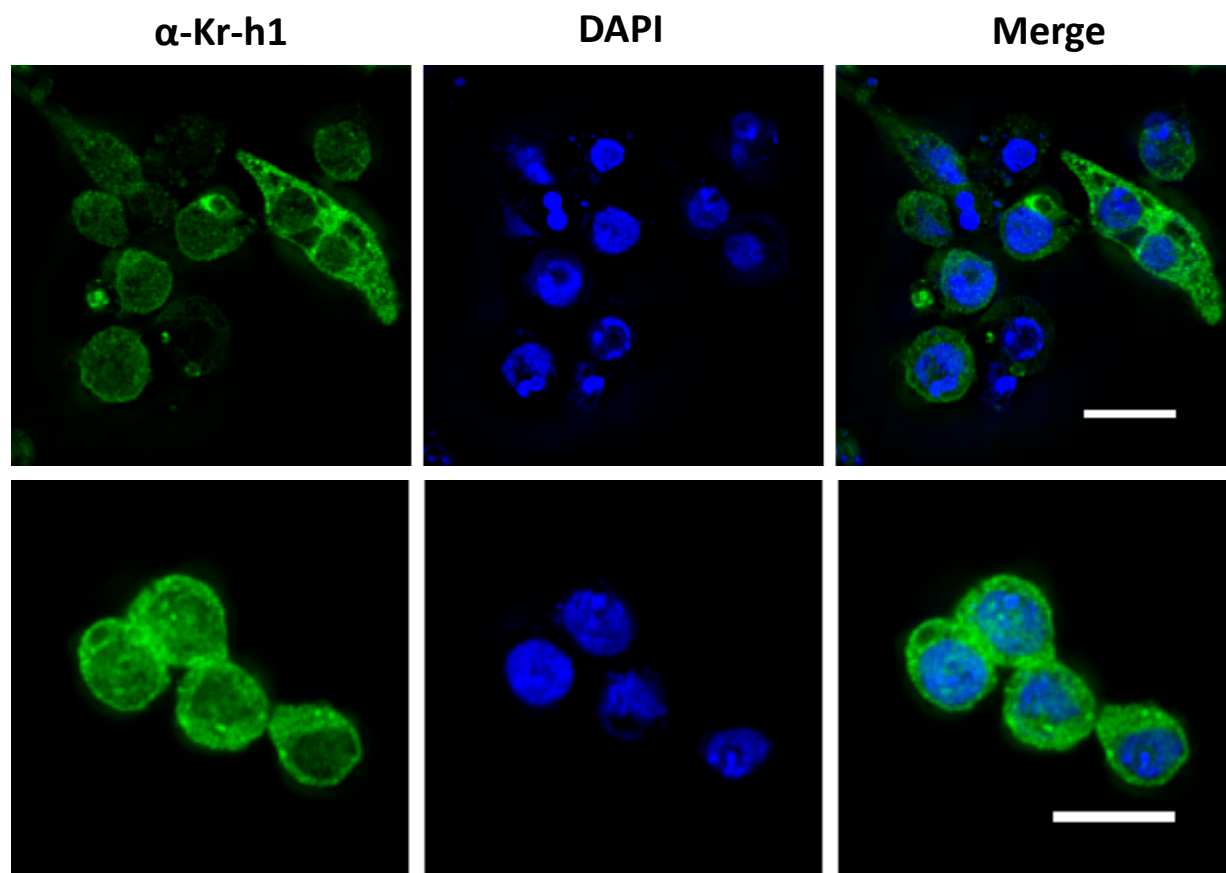

(Scale bar: 10  $\mu$ m)
